# Supplementary material
Source: Elsevier journal article supplement (https://git.physik.uzh.ch/gitbucket/mchrzasz/Lecture_repo/raw/f97e4637fa2275d51ab3a9248e08d773c059f8a1/Lectures_others/MC/W_Placzek_2010/mmc04.pdf)
Supplement: mmc04 [file mmc04.pdf]

# Generatory liczb losowych

- Liczby losowe i pseudolosowe.
- Podstawy generowania liczb pseudolosowych.
- Podstawowe typy generatorów liczb (pseudo)losowych o rozkładzie równomiernym.
  - ▷ Generatory liniowe.
  - ▷ Generatory SR (oparte na rejestrach przesuwanych).
  - ▷ Generatory Fibonacciego.
  - ▷ Generatory SWB (oparte o odejmowanie z pożyczką).
  - ▷ Generatory MWC (oparte o mnożenie z przeniesieniem).
  - ▷ Generatory nieliniowe.
- Kombinacje generatorów.
- Generator RANLUX i „operacyjna” definicja losowości.

⇒ <http://th-www.if.uj.edu.pl/~placzek/dydaktyka/MMC/>

“there is no such thing as a random number – there are only methods to produce random numbers”

John von Neumann

**Liczba losowa** – konkretna wartość przyjmowana przez zmienną losową (→ **nieprzewidywalna!**).

⇒ **Sekwencja liczb prawdziwie losowych** – **nieprzewidywalna, a zatem niereprodukowalna!**

● **Źródła liczb prawdziwie losowych – generatory fizyczne:**

\* „mechaniczne” – np. rzut monetą, losowanie z urny, ruletka itp.

\* **oparte o procesy fizyczne** – np. szum w urządzeniach elektronicznych (szczególnie tzw. szum biały), rozpad radioaktywny, promienie kosmiczne itp.

▶ **Wady generatorów fizycznych:**

\* **zbyt wolne** dla typowych potrzeb obliczeniowych (szczególnie „mechaniczne”);

\* **problemy ze stabilnością** – szczególnie generatory oparte o procesy fizyczne, np. niewielka zmiana warunków fizycznych źródła lub otoczenia może spowodować istotne zmiany własności probabilistycznych otrzymanych liczb

→ wymaga to dodatkowych urządzeń testujących i korygujących!

▷ Dawniej w użytku były **tablice liczb losowych** – niezbyt praktyczne!

→ Dziś wracają (?) – duże i tanie urządzenia pamięci masowej (twarde dyski, dyski CD/DVD itp.).

**1995:** G. Marsaglia, CD-ROM 650MB liczb losowych (pt. „White & Black Noise”): kompilacja szumu elektronicznego z muzyką rap.

**Uwaga:** Oferowane komercyjnie tzw. „fizyczne generatory liczb prawdziwie losowych” (najczęściej oparte o szумы elektroniczne) często nie spełniają prostych testów statystycznych!

→ Zanim zaczniesz się ich używać do poważnych obliczeń Monte Carlo należy poddać je gruntownym testom!

“Anyone who considers arithmetical methods of producing random digits is, of course, in a state of sin”

John von Neumann

**Liczby pseudolosowe** – liczby generowane według ścisłej formuły matematycznej (zatem reprodukowalne, a więc w ogóle nielosowe w sensie matematycznym), ale mające „wygląd” losowości, tzn. ich własności statystyczne są bardzo bliskie własnościom liczb prawdziwie losowych (ktoś kto nie zna formuły, według której są generowane, nie powinien być w stanie stwierdzić, że nie są to liczby prawdziwie losowe).

► **Źródła liczb pseudolosowych – generatory matematyczne (programowe):**

- \* dobre własności statystyczne generowanych liczb,
- \* łatwość użycia (proste, szybkie, wygodne, ...).

→ Wyparły prawie zupełnie generatory fizyczne!

Dlatego też liczby pseudolosowe są nazywane po prostu **liczbami losowymi** (ang. *random numbers*), a matematyczne algorytmy do ich otrzymywania nazywane są **generatorami liczb losowych** (ang. *random number generators – RNG*).

● **Pierwszy generator matematyczny: generator „środka kwadratu” Johna von Neumanna:**

→ **Formuła:** 
$$X_n = \lfloor X_{n-1}^2 \cdot 10^{-m} \rfloor - \lfloor X_{n-1}^2 \cdot 10^{-3m} \rfloor \cdot 10^{2m}$$

gdzie:  $X_i, m$  – liczby naturalne,  $X_0$  – stała,  $\lfloor \cdot \rfloor$  – obcięcie do liczby całkowitej.

▶ **Schemat działania – przykład:**

Niech:  $m = 2, X_0 = 2061,$

⇒  $X_0^2$  – liczba 8-cyfrowa (po ewentualnym dopisaniu zer po lewej stronie):

$$X_0^2 = \underbrace{04}_{\text{odrzucamy}} \ 2477 \ \underbrace{21}_{\text{odrzucamy}} \quad \Rightarrow X_1 = 2477,$$

$$X_1^2 = \underbrace{06}_{\text{odrzucamy}} \ 1355 \ \underbrace{29}_{\text{odrzucamy}} \quad \Rightarrow X_2 = 1355,$$

itd.

▶ **Generuje  $2m$ -cyfrowe sekwencje liczb – niestety krótkie i w dodatku silnie zależne od  $X_0$ !**

▷ Np. dla  $m = 1$  możemy otrzymać następujące ciągi:

- (1) 25, 62, 84, 05, 02, 00, 00, ... ← 6 różnych liczb;
- (2) 47, 20, 40, 60, 60, ... ← 4 różne liczby.
- (3) 50, 50, ... ← tylko 1 liczba!

- **Typowy schemat generatora liczb losowych:**

1) Wybieramy początkowe stałe:  $X_0, X_1, \dots, X_{k-1}$ .

2) Jeżeli wygenerowaliśmy już  $(n - 1)$  liczb, to  $n$ -tą liczbę obliczamy według pewnej formuły:

$$X_n = f(X_{n-1}, X_{n-2}, \dots, X_{n-k}), \quad n \geq k.$$

▷ Najczęściej generowane są liczby całkowite lub bity (0/1)  $\Rightarrow$  następnie konwertowane są one na liczby zmiennopozycyjne o **rozkładzie równomiernym** na przedziale  $[0, 1)$ , ozn.  $\mathcal{U}(0, 1)$ .

- **Okres generatora liczb losowych:**

Sekwencje liczb z generatora matematycznego – **ciągi okresowe!**

▷ Niech  $P, \nu$  – liczby całkowite, a  $X_0, X_1, \dots$  – sekwencja liczb losowych,

$$P \text{ – okres generatora (ciągu)} \iff \exists_{\nu, P} : X_i = X_{i+jP} \quad (j = 1, 2, \dots) \quad \forall_{i \geq \nu}.$$

Zwykle okres może być wyznaczony teoretycznie (choć czasami może to być trudne!).

▶ **Wymagania co do okresu generatora:**

Jeżeli  $N$  – ilość liczb losowych użyta w obliczeniach, wówczas:

$$N \ll P.$$

$\rightarrow$  W praktyce na ogół wymaga się:  $N < P^{2/3}$ .

▷ Popularny generator: „**Mersenne Twister**” (Matsumoto & Nishimura, 1998):  $P \approx 10^{6000}$ .

► **Ogólna postać:**

$$X_n = (a_1 X_{n-1} + a_2 X_{n-2} + \dots + a_k X_{n-k} + c) \bmod m,$$

gdzie:  $a_1, \dots, a_k, c, m$  – parametry generatora (ustalone liczby całkowite  $\geq 0$ ),

$a \bmod b$  – reszta z dzielenia całkowitego  $a$  przez  $b$ .

▷ **Inicjowanie generatora:** dostarczenie danych początkowych:  $X_0, X_1, \dots, X_{k-1}$ .

▷ **Okres generatora:**  $P \leq m^k - 1$  (maksymalny okres osiągnąć tylko dla odpowiednio dobranych parametrów).

► **Popularne implementacje** (np. w starych bibliotekach języków C/C++, Pascal):

$$k = 1 : \quad X_n = (aX_{n-1} + c) \bmod m,$$

$$c \begin{cases} = 0 : & \text{generator multiplikatywny,} \\ \neq 0 : & \text{generator mieszany.} \end{cases}$$

▷ **Okres generatora:**  $P = \min\{i : X_i = X_0, i \in \mathbb{N}\} \leq m - 1$ .

Maksymalny okres  $P_{\max}$  może być osiągnięty tylko przy odpowiednio dobranych  $a$  i  $c$ .

→ Np. dla generatorów multiplikatywnych:

$$P_{\max} = \begin{cases} 2^{L-2} : & \text{gdy } m = 2^L, \\ m - 1 : & \text{gdy } m \text{ – liczba pierwsza.} \end{cases}$$

Parametry kilku prostych generatorów liniowych o maksymalnych okresach:

| $a$                  | $c$ | $m$            | Nazwa/autor               |
|----------------------|-----|----------------|---------------------------|
| $2^{16} + 3$         | 0   | $2^{31}$       | RANDU (IBM360/370, PDP11) |
| $2^2 \cdot 23^7 + 1$ | 0   | $2^{35}$       | Zieliński (1966)          |
| 69069                | 1   | $2^{32}$       | Marsaglia (1972)          |
| 16807                | 0   | $2^{31} - 1$   | Park, Miller (1980)       |
| 40692                | 0   | $2^{31} - 249$ | L'Ecuyer (1988)           |
| 68909602460261       | 0   | $2^{48}$       | Fishman (1990)            |

$m$  – liczba pierwsza  $\Rightarrow$  na ogół lepsze własności statystyczne generatora.

▷ Wypracowano kilka reguł doboru parametrów, aby uzyskiwać maksymalne okresy generatorów.

**Uwaga:** Okres  $\sim 2^{32} \approx 4 \cdot 10^9$  zbyt mały dla obecnych potrzeb obliczeniowych!

▷ W praktyce wymaga się dla generatorów liniowych:  $N < \sqrt{P}$ .

▶ **Główna wada: Proste generatory liniowe nie spełniają nowszych testów statystycznych!**

► **Ogólniejsze generatory liniowe – Marsaglia (1995):**

(1)  $X_n = (1176X_{n-1} + 1476X_{n-2} + 1776X_{n-3}) \bmod m, \quad m = 2^{32} - 5;$

(2)  $X_n = 2^{13} (X_{n-1} + X_{n-2} + X_{n-3}) \bmod m, \quad m = 2^{32} - 5;$

(3)  $X_n = (1995X_{n-1} + 1998X_{n-2} + 2001X_{n-3}) \bmod m, \quad m = 2^{35} - 849;$

(4)  $X_n = 2^{19} (X_{n-1} + X_{n-2} + X_{n-3}) \bmod m, \quad m = 2^{32} - 1629;$

▷ Okres:  $P = m^3 - 1$ .

→ Uzyskały dobrą ocenę statystyczną.

● **Postawowa wada generatorów liniowych:**

Wielowymiarowe rozkłady wyglądają „bardzo niełosowo”! → tzw. „efekt Marsaglii”:

▷ Niech:  $U_i = X_i/m, \quad i = 1, 2, \dots, \Rightarrow U_i \in [0, 1)$ .

Punkty:  $(U_1, U_2, \dots, U_k), (U_2, U_3, \dots, U_{k+1}), \dots,$

a także punkty:  $(U_1, U_2, \dots, U_k), (U_{k+1}, U_{k+2}, \dots, U_{2k}), \dots$

układają się na **regularnych hiperpłaszczyznach** wewnątrz kostki  $[0, 1]^k$ .

→ Opracowano metody znajdowania odległości między hiperpłaszczyznami (analiza Fouriera).

► **Uogólnienie na wiele wymiarów:**

$$\vec{X}_{n+1} = \mathbf{A}\vec{X}_n \bmod m \quad \vec{X}_1, \vec{X}_2, \dots \in \mathbb{R}^n, \quad \mathbf{A} \in \mathbb{R}^n \times \mathbb{R}^n, \quad n > 1.$$

▷ Odpowiedni wybór macierzy  $\mathbf{A} \Rightarrow$  zależności między składowymi generowanych wektorów.

⇒ **Ćw. N5.1:** Zaimplementować przedstawione przykłady generatorów liniowych.

- **Generatory SR (oparte na rejestrach przesuwnych) – dla bitów:**

$$b_n = (a_1 b_{n-1} + \dots + a_k b_{n-k}) \bmod 2,$$

gdzie:  $a_1, \dots, a_k \in \{0, 1\}$  – stałe binarne.

▷ Łatwe do implementacji, ponieważ:  $(a + b) \bmod 2 = a \text{ xor } b$ , xor – różnica symetryczna.

| $a$ | $b$ | $a \text{ xor } b$ |
|-----|-----|--------------------|
| 0   | 0   | 0                  |
| 0   | 1   | 1                  |
| 1   | 0   | 1                  |
| 1   | 1   | 0                  |

▶ **Wówczas:**  $b_n = b_{n-i_1} \text{ xor } b_{n-i_2} \text{ xor } \dots \text{ xor } b_{n-i_l}$

gdym:  $a_{i_1} = \dots = a_{i_l} = 1$ , pozostałe  $a_i = 0$ .

▷ Dla  $k$ -elementowych układów:  $(b_1, b_2, \dots, b_k) \Rightarrow$  okres:  $P \leq 2^k - 1$ .

- ▶ Szczególny przypadek – **generator Tauswortha (1965):**

$a_p = a_q = 1$ , pozostałe  $a_i = 0$ ,  $p > q$ :

$$b_n = b_{n-p} \text{ xor } b_{n-q}.$$

▷ Jak z ciągów bitów uzyskiwać liczby losowe  $U_i \in \mathcal{U}(0, 1)$ ?

→ Np.  $U_i = \sum_{j=1}^L 2^{-j} b_{i_s+j} = 0.b_{i_s+1} \dots b_{i_s+L}$ ,  $s \leq L$ , ( $s$  – ustalona liczba całkowita).

Jeżeli  $s$  nie ma wspólnych dzielników z  $2^k - 1$ , to ciąg  $\{U_i\}$  ma maks. okres:  $P_{\max} = 2^k - 1$ .

- **Efektywny algorytm Tezuki dla generatora Tauswortha (1995):**

Niech:  $A$  –  $L$ -bitowa liczba całkowita o bitach początkowych:  $b_1, \dots, b_L \quad (\Rightarrow U_0)$ ,

a  $B$  –  $L$ -bitowa zmienna pomocnicza oraz  $q < p/2$  i  $0 < s < p - q$ :

1:  $B = ((A \ll q) \text{ xor } A) \ll (L - p)$

2:  $A = (A \ll s) \text{ xor } (B \gg (L - s))$

3: Return  $A$ ; goto 1

gdzie  $(A \ll k)$  oznacza przesunięcie bitów reprezentacji binarnej liczby  $A$  o  $k$  pozycji w lewo.

► Główna wada generatorów SR: **Nie spełniają niektórych nowszych testów statystycznych!**

- **Generator Tezuki (1995)** – kombinacja 3 generatorów Tauswortha:  $L = 32$ ,

| Generator | $p$ | $q$ | $s$           |           |
|-----------|-----|-----|---------------|-----------|
|           |     |     | Inicjalizacja | Generacja |
| 1.        | 28  | 9   | 4             | 13        |
| 2.        | 29  | 2   | 3             | 20        |
| 3.        | 31  | 6   | 1             | 17        |

▷ Do inicjalizacji potrzeba 3 liczby:

$$l_1 < 2^{28}, l_2 < 2^{29}, l_3 < 2^{31}.$$

▷ Generacja → 3 liczby:  $X_i, Y_i, Z_i \in \mathbb{N}$ ,

$$\Rightarrow U_i = (X_i \text{ xor } Y_i \text{ xor } Z_i) / 2^{32}.$$

▷ Okres:

$$P = (2^{28} - 1)(2^{29} - 1)(2^{31} - 1) \approx 3 \cdot 10^{26}.$$

► **Dobre własności statystyczne!**

⇒ **Ćw. N5.2:** Zaimplementować generator Tezuki.

▷ „**Mersenne Twister**” (Matsumoto & Nishimura) – ulepszony generator SR:  $P = 2^{19937} - 1$ .

- Liczby Fibonacciego (Fibonacci – Leonardo z Pizy, 1202):

$$f_n = f_{n-2} + f_{n-1}, \quad n \geq 2, \quad f_0 = f_1 = 1.$$

- ▶ Pierwszy generator Fibonacciego (Tausky i Todd, 1956):

$$X_n = (X_{n-2} + X_{n-1}) \bmod m, \quad n \geq 2.$$

▷ Nie spełnia testów niezależności liczb losowych!

- Uogólnione generatory Fibonacciego  $F(r, s, \odot)$ :

$$X_n = (X_{n-r} \odot X_{n-s}) \bmod m, \quad n \geq r > s \geq 1,$$

gdzie operator:  $\odot \in \{+, -, \times, \text{xor}\}$  → Łatwe w implementacji!

Maksymalny okres dla  $m = 2^L$ :

| $\odot$  | $P_{\max}$         | Własności statystyczne |
|----------|--------------------|------------------------|
| +, -     | $(2^r - 1)2^{L-1}$ | dobrze                 |
| $\times$ | $(2^r - 1)2^{L-3}$ | bardzo dobrze          |
| xor      | $2^r - 1$          | niezbyt dobrze         |

Przykładowe wartości  $r$  i  $s$  dające maksymalne okresy:

|     |    |    |    |    |    |     |      |
|-----|----|----|----|----|----|-----|------|
| $r$ | 17 | 31 | 55 | 68 | 97 | 607 | 1279 |
| $s$ | 5  | 13 | 24 | 33 | 33 | 273 | 418  |

- Popularny generator **MZT**, znany również jako **RANMAR** (Marsaglia, Zaman, Tsang, 1990):

▷ **Uniwersalny** – daje identyczne wyniki na komputerach, gdzie:

- \* liczby całkowite – co najmniej 16 bitów,
- \* liczby zmiennopozycyjne – co najmniej 24 bity mantysy.

▶ Kombinacja 2 generatorów:

## 1. Generator typu Fibonacciego:

$$F(97, 33, \bullet) \longrightarrow V_n \in [0, 1),$$

gdzie:

$$x \bullet y = \begin{cases} x - y, & x \geq y, \\ x - y + 1, & x < y. \end{cases}$$

▷ **Inicjalizacja generatora** – wyznaczenie liczb:  $V_1, V_2, \dots, V_{97}$

za pomocą ciągu bitów:  $V_1 = 0.b_1b_2 \dots b_{24}$ ,  $V_2 = 0.b_{25}b_{26} \dots b_{48}$ , ...

→ Ciąg bitów  $\{b_n\}$  generowany za pomocą dwóch generatorów:

$$\left. \begin{array}{l} y_n = (y_{n-3} \cdot y_{n-2} \cdot y_{n-1}) \bmod 179 \\ z_n = (53z_{n-1} + 1) \bmod 169 \end{array} \right\} \Rightarrow b_n = \begin{cases} 0, & (y_n \cdot z_n) \bmod 64 < 32, \\ 1, & (y_n \cdot z_n) \bmod 64 \geq 32. \end{cases}$$

▷ **Inicjowanie** – dostarczenie 4 liczb:  $y_1, y_2, y_3 \in \{1, 2, \dots, 178\}$ ,  $z_1 \in \{0, 1, \dots, 168\}$ .

▶ **Okres:**  $P = 2^{120}$ .  
( $y_1 \cdot y_2 \cdot y_3 \neq 1$ )

**2. Generator liczb losowych**  $c_n \in (0, 1)$ :

$$c_n = c_{n-1} \circ (7654321/16777216), \quad n \geq 2, \quad c_1 = 362436/16777216,$$

gdzie:

$$c \circ d = \left\{ \begin{array}{ll} c - d, & c \geq d \\ c - d + (16777213/16777216), & c < d \end{array} \right\} c, d \in [0, 1).$$

▷ Okres:  $P = 2^{24} - 3$ .● **Ostatecznie generator MZT:**

$$U_n = V_n \bullet c_n.$$

▷ Okres:  $P \simeq 2^{144} \approx 2 \cdot 10^{43}$ .▶ **Spełnia wszystkie znane testy statystyczne!**⇒ **Ćw. N5.3:** Zaimplementować wybrany uogólniony generator Fibonacciego.⇒ **Ćw. N2\*** (nadobowiązkowe): Zaimplementować generator MZT.

- **Generatory SWB (oparte na odejmowaniu z pożyczką) (Marsaglia & Zaman, 1991):**

Ozn.  $c$  – bit przeniesienia, tzn.  $c \in \{0, 1\}$ .

Na początku:  $c = 0$ ,

→ Odejmowanie z pożyczką (SWB):

$$x \ominus y \bmod m = \begin{cases} x - y - c + m, & \text{oraz } c = 1, \text{ gdy } x - y - c < 0, \\ x - y - c, & \text{oraz } c = 0, \text{ gdy } x - y - c \geq 0. \end{cases}$$

► Schemat:

$$X_n = X_{n-r} \ominus X_{n-s} \bmod m \quad r, s \in \mathbb{N}, r > s.$$

▷ Inicjalizacja:

Ciąg liczb całkowitych  $X_1, \dots, X_r \in (0, m)$  oraz  $c = 0$ .

► Zalety: Proste i szybkie!

► Wady: Nie spełniają niektórych nowszych testów statystycznych (niezależności)!

▷ Przykłady:

- Generator **RCARRY** (F. James, 1990):  $r = 24, s = 10, m = 2^{24} \rightarrow$  Okres:  $P \approx 5 \cdot 10^{171}$ .
- Generator **ULTRA** (Marsaglia, Zaman):  $r = 37, s = 24, m = 2^{32} \rightarrow$  Okres:  $P \approx 10^{346}$ .

- **Generatory MWC (oparte na mnożeniu z przeniesieniem) – G. Marsaglia:**

- ▶ Schemat:

$$X_n = (a_1 X_{n-1} + a_2 X_{n-2} + \dots + a_r X_{n-r} + c) \bmod m,$$

gdzie:  $a_1, a_2, \dots, a_r \in \mathbb{N}$  – ustalone parametry,

$c$  – tzw. **wartość przeniesienia** (do następnego kroku):

$$c = \lfloor (a_1 X_{n-1} + a_2 X_{n-2} + \dots + a_r X_{n-r} + c) / m \rfloor,$$

gdzie:  $\lfloor a \rfloor$  ozn. część całkowitą liczby  $a$ .

▷ **Inicjalizacja** – dowolne wartości początkowe:  $X_1, X_2, \dots, X_r$  i  $c$ .

- ▶ Zalety:

- \* Proste, szybkie, łatwe w implementacji.

- \* Mają długie okresy.

- \* Bardzo dobre własności statystyczne.

▷ Wiele generatorów zaproponowanych przez Marsaglię.

## 1. MWC1:

$$\left. \begin{aligned} X_n &= (18000 X_{n-1} + c_X) \bmod 2^{16} \\ Y_n &= (30903 Y_{n-1} + c_Y) \bmod 2^{16} \end{aligned} \right\} \text{liczby 16-bitowe}$$

$$\Rightarrow Z_n = b_1^{X_n} \dots b_{16}^{X_n} b_1^{Y_n} \dots b_{16}^{Y_n} \quad \text{– liczba 32-bitowa.}$$

- ▷ **Inicjalizacja:** Dwie liczby 32-bitowe  $\Rightarrow X_0, Y_0$  oraz  $c_X, c_Y$ , np.  $\underbrace{b_1 \dots b_{16}}_{X_0} \underbrace{b_{17} \dots b_{32}}_{c_X}$  itd.
- ▶ **Okres:**  $P \simeq 2^{60} \approx 10^{18}$ .

## 2. MWC2:

$$X_n = (12013 X_{n-8} + 1066 X_{n-7} + 1215 X_{n-6} + 1492 X_{n-5} + 1776 X_{n-4} + 1812 X_{n-3} + 1860 X_{n-2} + 1941 X_{n-1} + c_X) \bmod 2^{16}$$

$$Y_n = (9272 Y_{n-8} + 7777 Y_{n-7} + 6666 Y_{n-6} + 5555 Y_{n-5} + 4444 Y_{n-4} + 3333 Y_{n-3} + 2222 Y_{n-2} + 1111 Y_{n-1} + c_Y) \bmod 2^{16}$$

$\Rightarrow$  32-bitowa liczba  $Z_n$  z połączenia bitów 16-bitowych liczb  $X_n, Y_n$ .

- ▷ **Inicjalizacja:** 16 liczb całkowitych 16-bitowych, np. z prostego generatora liniowego.

▶ **Okres:**  $P \simeq 2^{250} \approx 2 \cdot 10^{75}$ .

$\Rightarrow$  **Ćw. N5.4:** Zaimplementować generatory MWC1 i MWC2 (użyć operacji bitowych).

- ▶ Naturalnym pomysłem na uniknięcie problemów związanych z generatorami liniowymi wydaje się generowanie ciągów liczb w oparciu o formuły nieliniowe.
- ▷ Dziedzina generatorów nieliniowych rozwija się od połowy lat 1980-tych.

- **Generator inwersyjny Eichenauera i Lehna (1986):**

$$X_n = (aX_{n-1}^{-1} + b) \bmod m,$$

gdzie:  $c^{-1}$  – liczba całkowita:  $c \cdot c^{-1} \bmod m = 1$ ,  $m$  – liczba pierwsza.

→  $X_n \in \{0, 1, \dots, m - 1\} \Rightarrow U_n = (X_n/m) \in [0, 1)$ .

- **Generator inwersyjny Eichenauera-Hermannna (1993):**

$$X_n = [a(n + n_0) + b]^{-1} \bmod m, \quad a \in \{1, 2, \dots, m\}$$

→ Liczba  $X_n$  może być otrzymana niezależnie od innych elementów ciągu; okres:  $P = m$ .

▷ Użyteczne dla obliczeń równoległych.

- **Generator kwadratowy – L. Blum, M. Blum, Shub (1986):**

$$X_n = X_{n-1}^2 \bmod m,$$

▷ Zastosowania w kryptografii.

- ▶ **Zalety:** Bardzo dobre własności statystyczne (spełniają wszystkie znane testy).
- ▶ **Wady:** Są wolniejsze od generatorów liniowych.

- **Kombinacje kilku generatorów – zwykle dają lepsze wyniki, ale nie zawsze!**

▶ **Przykłady:** Przedstawione wcześniej generatory Tezuki i MZT.

▶ **Kombinacje nieliniowych generatorów inwersyjnych:**

Weźmy  $r \geq 5$  generatorów inwersyjnych (przedstawionych powyżej):

$$X_m^{(j)}, \quad j = 1, \dots, r$$

z parametrami  $m_j, j = 1, \dots, r$ , będącymi liczbami pierwszymi.

$$\Rightarrow U_n = U_n^{(1)} + \dots + U_n^{(r)} \bmod 1, \quad n = 0, 1, 2, \dots,$$

gdzie  $U_n^{(j)} = X_n^{(j)} / m_j, j = 1, \dots, r$ .

▷ **Długi okres:**  $P = m_1 m_2 \dots m_r$ .

▷ **Bardzo dobre własności statystyczne!**

▶ Więcej szczegółów nt. generatorów nieliniowych i nie tylko: <http://random.mat.sbg.ac.at/>

⇒ **Ćw. N6.1:** Zastosować powyższe implementacje generatorów liczb losowych do obliczania całek

$\Phi$  i  $\Psi$  z wykładu 2. Porównywać otrzymywane wyniki z wynikami poprzednimi.

- Wszystkie przedstawione wyżej matematyczne generatory liczb losowych opierają się na pewnych formułach rekurencyjnych!
- ▷ **Typowy schemat konstrukcji generatora liczb losowych:**  
W oparciu o teorię liczb i statystykę matematyczną skonstruować odpowiednią formułę rekurencyjną, a następnie liczby otrzymywane według tej formuły poddać szeregowi testów statystycznych. Jeżeli wyniki testów są pozytywne, to akceptujemy dany generator.  
→ Ale to nie daje nam odpowiedzi na pytanie, dlaczego te liczby wyglądają losowo!
- ▶ **Właściwie nie ma żadnego wyraźnego powodu by formuły rekurencyjne miały dawać liczby losowe lub nawet wyglądające na losowe!** → To, że tak jest wydaje się raczej zaskakujące!
- **1993: M. Lüscher** – fizyk teoretyk, specjalizujący się w kwantowej teorii pola na siatkach.
  - ▷ **Artykuł:** hep-lat/9309020, Comput. Phys. Commun. **79** (1994) 100.
  - ▶ **„Wreszcie pojawiła się teoria generowania liczb losowych” (F. James)**
    - ▷ **Artykuł:** F. James, *“Finally, a theory of random number generation”*, Proceedings of the Fifth Workshop on Mathematical Methods in Scattering Theory and Biomedical Technology, Corfu, Greece, October 2001, D. Fiotiadis and C. Massalas (eds.), World Scientific (2002).

- **Operacyjna definicja losowości w sensie wymaganym w rachunkach Monte Carlo:** oparta o chaotyczne zachowanie w klasycznych układach dynamicznych (teorie Kołmogorowa i Arnolda) – użycie wykładników Lapunowa i entropii Kołmogorowa do badania chaotycznego zachowania liczb produkowanych przez generator.
- **Generator RANLUX:** oparty o generator SWB o nazwie RCARRY (patrz: str. 14) – uzupełniony o algorytm odrzucania pewnych sekwencji liczb w celu osiągnięcia wystarczająco „chaotycznych” własności generowanych liczb losowych (→ usuwanie korelacji krótkozasięgowych).

▷ Okres:  $P \approx 5 \cdot 10^{171}$ .

▶ **Przeszedł pomyślnie najsurowsze testy statystyczne!**

▷ Niestety, pomijany milczeniem przez niemal wszystkich matematyków – ekspertów od generatorów liczb losowych (wg. F. Jamesa nie znają oni teorii chaosu Kołmogorowa i Arnolda).

▶ Cytowany w książce Donalda E. Knutha, „Sztuka programowania” tom 2, WNT 2002: potwierdzenie jego dobrych własności statystycznych, ale brak zrozumienia dla teorii.

⇒ **Ćw. N6.2:** Zastosować generatory RANLUX (TRandom1) i Mersenne Twister (TRandom3) z systemu ROOT do obliczania całek  $\Phi$  i  $\Psi$  z wykładu 2. Porównywać otrzymywane wyniki z wynikami poprzednimi.
